# Supplementary material
Source: PubMed Central journal article supplement (PMC1941812)

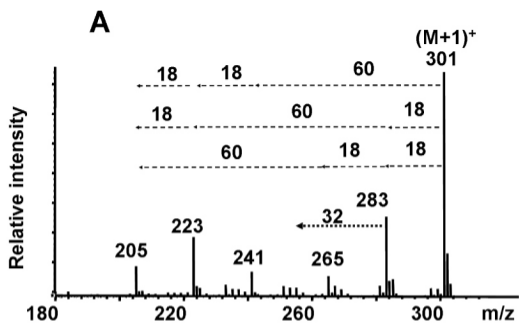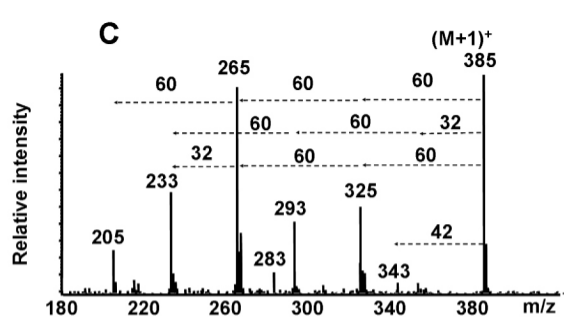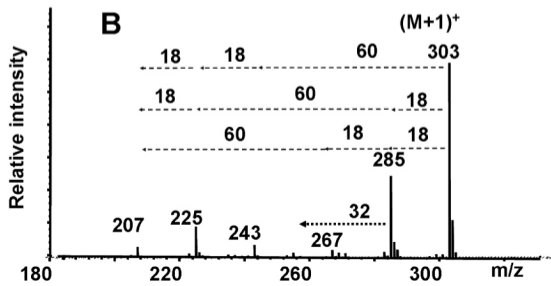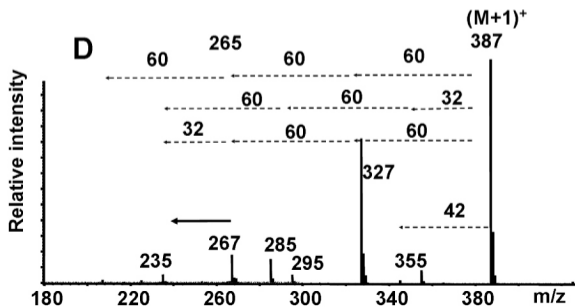

Supplement: pnas_0705947104_2.pdf [file pnas_0705947104_2.pdf]

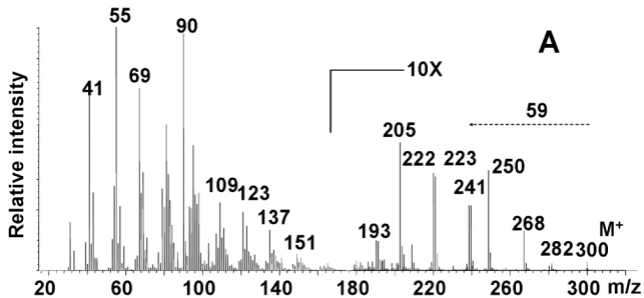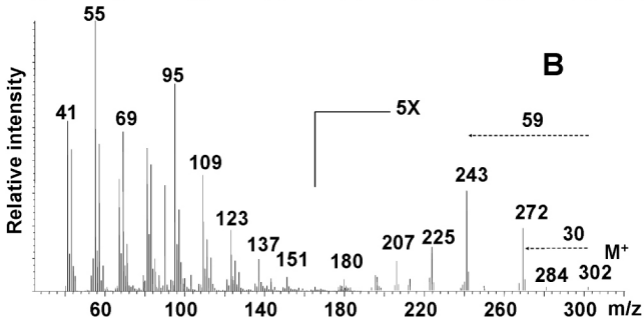

Supplement: pnas_0705947104_3.pdf [file pnas_0705947104_3.pdf]

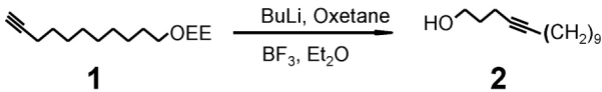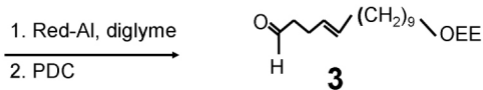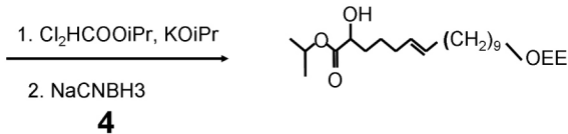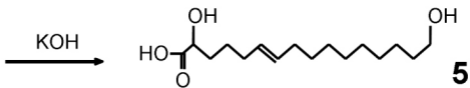

Supplement: pnas_0705947104_4.pdf [file pnas_0705947104_4.pdf]

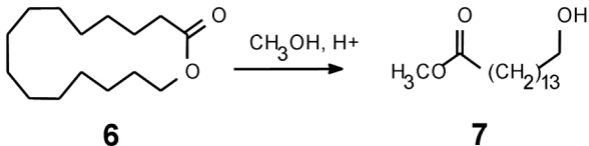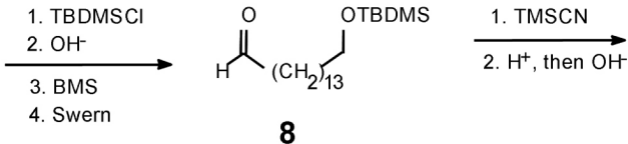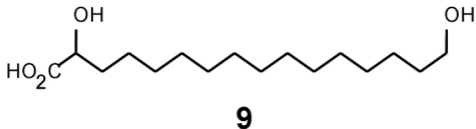

Supplement: pnas_0705947104_5.pdf [file pnas_0705947104_5.pdf]
